# Supplementary material for: Ligands with an NPNPN-framework and their application in chromium catalysed ethene tri-/tetramerization
Source: Royal Society of Chemistry journal article supplement (doi:10.1039/c6dt01109h), 2016-01-01
Supplement: c6dt01109h1.pdf [file c6dt01109h1.pdf]

## Supporting Information File

### **Ligands with NPNP-*n*-framework and their application in chromium catalyzed ethene Tri-/Tetramerization**

N. Peulecke, B. H. Müller, A. Spannenberg, M. Höhne, U. Rosenthal, A. Wöhl, W. Müller, A. Alqahtani<sup>†</sup>,  
M. Al Hazmi

#### **This file includes:**

|                                |   |
|--------------------------------|---|
| 1. General Information .....   | 2 |
| 2. Structure Elucidation ..... | 3 |
| 3. Literature .....            | 8 |

## 1 General Information

All manipulations were carried out in an oxygen- and moisture-free argon atmosphere using standard Schlenk and drybox techniques. The solvents were purified with the Grubbs-type column system "Pure Solv MD-5" and dispensed into thick-walled glass Schlenk bombs equipped with Young-type Teflon valve stopcocks. The commercially available amines (Sigma Aldrich) were purified by distillation and stored under argon prior to use.

The following spectrometers were used:

Mass spectra: Finnigan, MAT 95-XP from Thermo-Electron,  $\text{Cl}^+$  *Isobutene*.

NMR spectra: Bruker AV 300 and AV400,  $^1\text{H}$  and  $^{13}\text{C}$  chemical shifts were referenced to the solvent signals: benzene- $d_6$  ( $\delta_{\text{H}}$  7.15 ppm,  $\delta_{\text{C}}$  128.6 ppm)<sup>1</sup>,  $\text{CDCl}_3$  ( $\delta_{\text{H}}$  7.26,  $\delta_{\text{C}}$  77.4 ppm)<sup>1</sup>

IR spectra: Bruker Alpha FT-IR.

Melting points: METTLER-TOLEDO MP 70. Melting points are uncorrected and were measured in sealed capillaries.

Elemental analyses: Leco Tru Spec elemental analyzer.

## 2 Structure Elucidation

Diffraction data for **2**, **3**, **5**, **6**, **7**, **8** and **11** were collected on a Bruker APEX-II CCD diffractometer using graphite-monochromated Mo K $\alpha$  radiation. The structures were solved by direct methods and refined by full-matrix least-squares procedures on  $F^2$  with the SHELXTL software package.<sup>2</sup> All non-hydrogen atoms were refined anisotropically, hydrogen atoms, except H1, H3 in **6** and H1, H3A in **8**, were included in the refinement at calculated positions using a riding model. H1, H3 in **6** and H1, H3A in **8** were found from difference Fourier maps. *XP* in *SHELXTL* (Sheldrick, 2008) and *Diamond* were used for graphical representation.

**Table S1.** Crystallographic Details of

|                                                  | <b>2</b>                                                      | <b>3</b>                                                                       | <b>5</b>                                                      | <b>6</b>                                                      | <b>7</b>                                                                     |
|--------------------------------------------------|---------------------------------------------------------------|--------------------------------------------------------------------------------|---------------------------------------------------------------|---------------------------------------------------------------|------------------------------------------------------------------------------|
| Chem. Formula                                    | C <sub>27</sub> H <sub>41</sub> N <sub>3</sub> P <sub>2</sub> | C <sub>31</sub> H <sub>41</sub> CrN <sub>3</sub> O <sub>4</sub> P <sub>2</sub> | C <sub>24</sub> H <sub>37</sub> N <sub>3</sub> P <sub>2</sub> | C <sub>21</sub> H <sub>33</sub> N <sub>3</sub> P <sub>2</sub> | C <sub>29</sub> H <sub>33</sub> N <sub>3</sub> O <sub>2</sub> P <sub>2</sub> |
| Form. Weight<br>[g mol <sup>-1</sup> ]           | 469.57                                                        | 633.61                                                                         | 429.50                                                        | 389.44                                                        | 517.52                                                                       |
| Colour                                           | colourless                                                    | yellow                                                                         | colourless                                                    | colourless                                                    | colourless                                                                   |
| Cryst. system                                    | monoclinic                                                    | monoclinic                                                                     | monoclinic                                                    | orthorhombic                                                  | monoclinic                                                                   |
| Space group                                      | <i>P2<sub>1</sub>/c</i>                                       | <i>P2<sub>1</sub>/n</i>                                                        | <i>C2/c</i>                                                   | <i>Pbcn</i>                                                   | <i>P2<sub>1</sub></i>                                                        |
| a [Å]                                            | 13.1928(5)                                                    | 10.8808(3)                                                                     | 28.2829(8)                                                    | 19.6420(4)                                                    | 9.8140(3)                                                                    |
| b [Å]                                            | 18.7757(6)                                                    | 16.6923(4)                                                                     | 9.4907(3)                                                     | 12.6315(2)                                                    | 6.7216(2)                                                                    |
| c [Å]                                            | 11.8910(4)                                                    | 17.5806(4)                                                                     | 18.7206(5)                                                    | 18.2652(3)                                                    | 20.3460(6)                                                                   |
| α [°]                                            | 90.00                                                         | 90.00                                                                          | 90.00                                                         | 90.00                                                         | 90.00                                                                        |
| β [°]                                            | 116.0964(9)                                                   | 98.4501(7)                                                                     | 107.0550(6)                                                   | 90.00                                                         | 99.8118(10)                                                                  |
| γ [°]                                            | 90.00                                                         | 90.00                                                                          | 90.00                                                         | 90.00                                                         | 90.00                                                                        |
| V [Å <sup>3</sup> ]                              | 2645.17(16)                                                   | 3158.42(14)                                                                    | 4804.1(2)                                                     | 4531.74(14)                                                   | 1322.51(7)                                                                   |
| Z                                                | 4                                                             | 4                                                                              | 8                                                             | 8                                                             | 2                                                                            |
| Radiation type                                   | MoKα                                                          | MoKα                                                                           | MoKα                                                          | MoKα                                                          | MoKα                                                                         |
| ρ <sub>calc.</sub> [g cm <sup>-3</sup> ]         | 1.179                                                         | 1.332                                                                          | 1.188                                                         | 1.142                                                         | 1.300                                                                        |
| μ [mm <sup>-1</sup> ]                            | 0.184                                                         | 0.503                                                                          | 0.196                                                         | 0.201                                                         | 0.196                                                                        |
| T [K]                                            | 150(2)                                                        | 150(2)                                                                         | 150(2)                                                        | 150(2)                                                        | 150(2)                                                                       |
| reflections<br>measured                          | 60871                                                         | 65359                                                                          | 41117                                                         | 65452                                                         | 32668                                                                        |
| independent<br>reflections                       | 6395                                                          | 7631                                                                           | 5809                                                          | 5207                                                          | 6987                                                                         |
| R <sub>int.</sub>                                | 0.0274                                                        | 0.0392                                                                         | 0.0248                                                        | 0.0369                                                        | 0.0249                                                                       |
| R <sub>1</sub> ( <i>I</i> > 2σ( <i>I</i> ))      | 0.0461                                                        | 0.0305                                                                         | 0.0317                                                        | 0.0394                                                        | 0.0300                                                                       |
| wR(F <sup>2</sup> ) ( <i>I</i> > 2σ( <i>I</i> )) | 0.1213                                                        | 0.0732                                                                         | 0.0814                                                        | 0.0976                                                        | 0.0741                                                                       |
| R <sub>1</sub> (all data)                        | 0.0557                                                        | 0.0427                                                                         | 0.0373                                                        | 0.0492                                                        | 0.0333                                                                       |
| wR <sub>2</sub> (F <sup>2</sup> )(all data)      | 0.1318                                                        | 0.0802                                                                         | 0.0859                                                        | 0.1032                                                        | 0.0760                                                                       |
| GOF on F <sup>2</sup>                            | 1.023                                                         | 1.019                                                                          | 1.050                                                         | 1.152                                                         | 1.074                                                                        |
| Flack<br>parameter                               | -                                                             | -                                                                              | -                                                             | -                                                             | 0.11                                                                         |
| CCDC number                                      | 1405811                                                       | 1405812                                                                        | 1405813                                                       | 1405814                                                       | 1405815                                                                      |

|                                                                           | <b>8</b>                                                                     | <b>11</b>                                                     |
|---------------------------------------------------------------------------|------------------------------------------------------------------------------|---------------------------------------------------------------|
| Chem. Formula                                                             | C <sub>27</sub> H <sub>29</sub> N <sub>3</sub> O <sub>2</sub> P <sub>2</sub> | C <sub>26</sub> H <sub>41</sub> N <sub>3</sub> P <sub>2</sub> |
| Form. Weight [g mol <sup>-1</sup> ]                                       | 489.47                                                                       | 457.56                                                        |
| Colour                                                                    | colourless                                                                   | colourless                                                    |
| Cryst. system                                                             | monoclinic                                                                   | monoclinic                                                    |
| Space group                                                               | <i>P</i> 2 <sub>1</sub> / <i>c</i>                                           | <i>P</i> 2 <sub>1</sub> / <i>n</i>                            |
| <i>a</i> [Å]                                                              | 14.6955(6)                                                                   | 10.5529(2)                                                    |
| <i>b</i> [Å]                                                              | 11.8223(5)                                                                   | 14.8073(3)                                                    |
| <i>c</i> [Å]                                                              | 14.3639(5)                                                                   | 17.6501(3)                                                    |
| $\alpha$ [°]                                                              | 90.00                                                                        | 90.00                                                         |
| $\beta$ [°]                                                               | 94.7107(7)                                                                   | 106.706(1)                                                    |
| $\gamma$ [°]                                                              | 90.00                                                                        | 90.00                                                         |
| <i>V</i> [Å <sup>3</sup> ]                                                | 2487.08(17)                                                                  | 2641.59(9)                                                    |
| <i>Z</i>                                                                  | 4                                                                            | 4                                                             |
| Radiation type                                                            | MoK $\alpha$                                                                 | MoK $\alpha$                                                  |
| $\rho_{\text{calc.}}$ [g cm <sup>-3</sup> ]                               | 1.307                                                                        | 1.151                                                         |
| $\mu$ [mm <sup>-1</sup> ]                                                 | 0.205                                                                        | 0.182                                                         |
| <i>T</i> [K]                                                              | 150(2)                                                                       | 150(2)                                                        |
| reflections measured                                                      | 41193                                                                        | 45478                                                         |
| independent reflections                                                   | 6010                                                                         | 6374                                                          |
| <i>R</i> <sub>int.</sub>                                                  | 0.0530                                                                       | 0.0317                                                        |
| <i>R</i> <sub>1</sub> ( <i>I</i> > 2 $\sigma$ ( <i>I</i> ))               | 0.0362                                                                       | 0.0324                                                        |
| <i>wR</i> ( <i>F</i> <sup>2</sup> ) ( <i>I</i> > 2 $\sigma$ ( <i>I</i> )) | 0.0844                                                                       | 0.0866                                                        |
| <i>R</i> <sub>1</sub> (all data)                                          | 0.0596                                                                       | 0.0402                                                        |
| <i>wR</i> <sub>2</sub> ( <i>F</i> <sup>2</sup> )(all data)                | 0.0971                                                                       | 0.0944                                                        |
| GOF on <i>F</i> <sup>2</sup>                                              | 1.024                                                                        | 1.054                                                         |
| Flack parameter                                                           | -                                                                            | -                                                             |
|                                                                           |                                                                              |                                                               |
| CCDC number                                                               | 1405816                                                                      | 1405817                                                       |

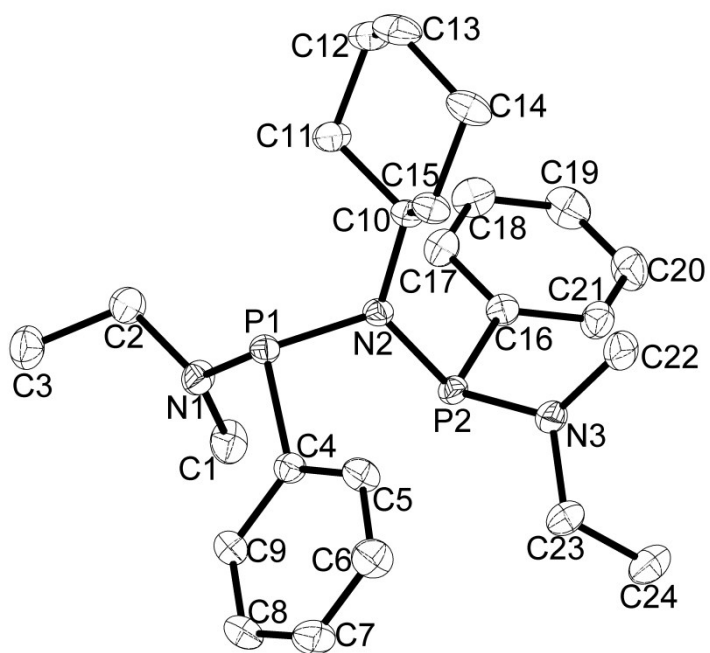

**Scheme S 1.** Numbering scheme of the molecular structure of (*R/S*) Et(Me)NP(Ph)NcycP(Ph)N(Me)Et (**5**).

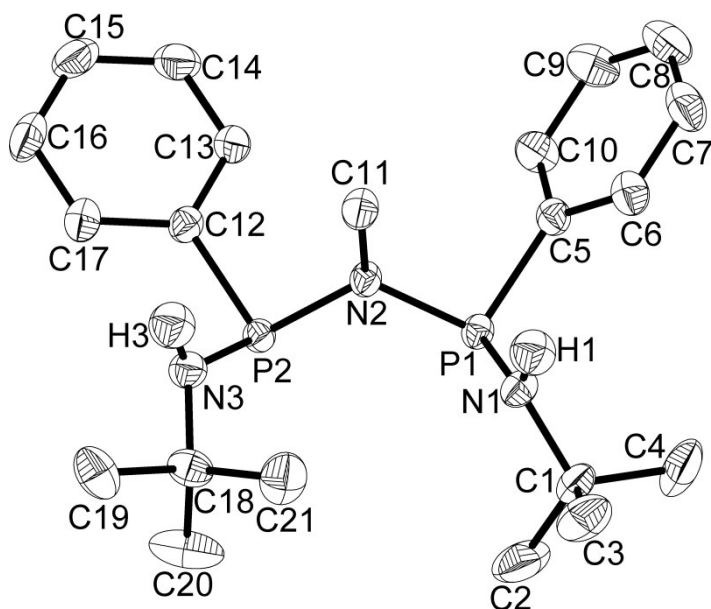

**Scheme S 2.** Numbering scheme of the molecular structure of (*R/S*) - H(tBu)NP(Ph)NMeP(Ph)N(tBu)H (**6**).

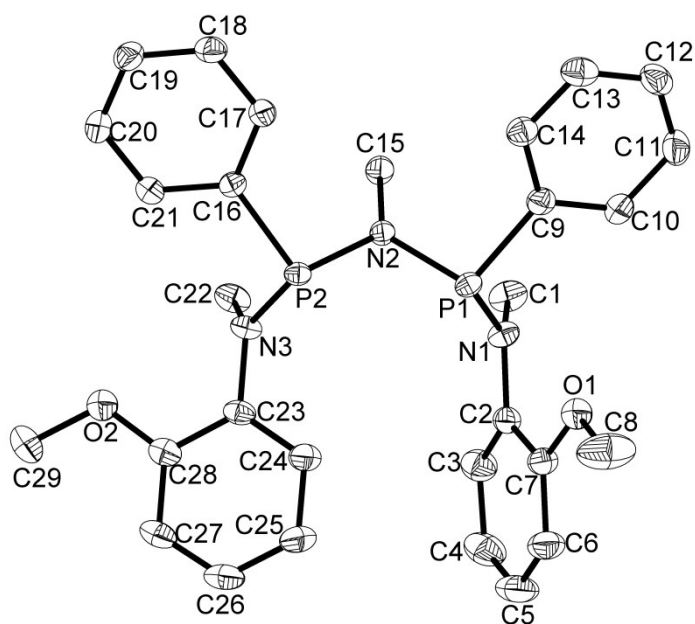

**Scheme S 3.** Numbering scheme of molecular structure of (*R/S*) -Me(o-MeO-C<sub>6</sub>H<sub>4</sub>)NP(Ph)NMeP(Ph)N(o-MeO-C<sub>6</sub>H<sub>4</sub>)Me (**7**).

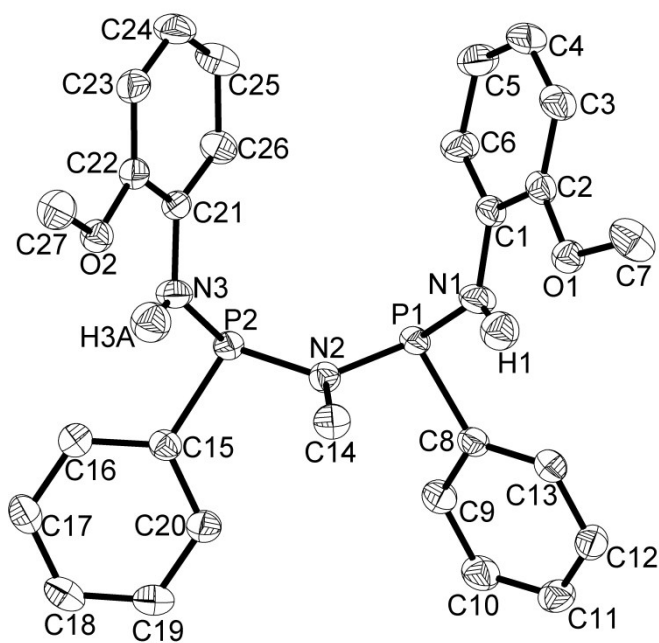

**Scheme S 4.** Numbering scheme of the molecular structure of (*R/S*) -H(o-MeO-C<sub>6</sub>H<sub>4</sub>)NP(Ph)NMeP(Ph)N(o-MeO-C<sub>6</sub>H<sub>4</sub>)H (**8**).

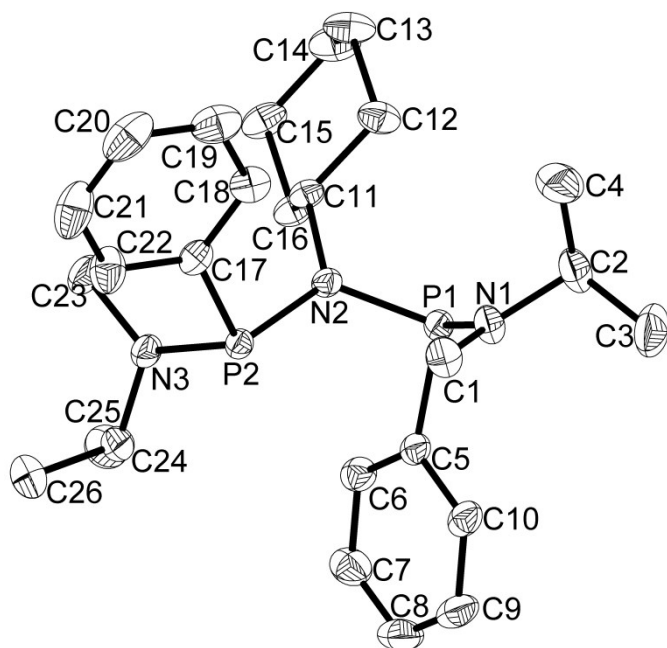

**Scheme S 5.** Numbering scheme of Molecular structure of (*R/S*) - iPrN(Me)P(Ph)NcycP(Ph)N(Me)iPr (**11**).

### 3. Literature

- 1 G. Fulmer *et al.*, *Organometallics* **2010**, 29, 2176-2179.
- 2 G. M. Sheldrick, *Acta Cryst.* **2008**, A64, 112-122.
